## Perspective

# The nitric oxide paradox: antimicrobial and inhibitor of antibiotic efficacy

Calum M. Webster and  Mark Shepherd

School of Biosciences, RAPID Group, University of Kent, Canterbury CT2 7NJ, U.K.

**Correspondence:** Mark Shepherd (M.Shepherd@kent.ac.uk)

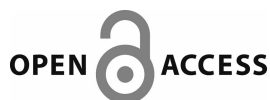

It is well-known that antibiotics target energy-consuming processes and a significant body of research now supports the conclusion that the metabolic state of bacteria can have a profound impact upon the efficacy of antibiotics. Several articles implicate bacterial energetics and the respiratory inhibitor nitric oxide (NO) in this process, although pinpointing the precise mechanism for how NO can diminish the potency of a range of antibiotics through modulating bacterial energy metabolism has proved challenging. Herein, we introduce the role of NO during infection, consider known links between NO and antibiotic efficacy, and discuss potential mechanisms via which NO present at the site of infection could mediate these effects through controlling bacterial energetics. This perspective article highlights an important relationship between NO and antibiotic action that has largely been overlooked and outlines future considerations for the development of new drugs and therapies that target bacterial energy metabolism.

## Introduction

Many studies have reported bacterial metabolism to elicit a profound impact upon susceptibility to antibiotics and there is now a widely accepted link between the two [1]. However, while several articles have reported the modulation of antibiotic efficacy by NO, we are yet to piece together the details of a generalised mechanism for how NO exposure can diminish the potency of numerous antibiotic classes. Herein, we aim to assemble a narrative on this and consider the broader implications of these findings for future drug discovery.

## NO is an antimicrobial respiratory inhibitor

Before one can consider the influence of NO upon antibiotic efficacy, it is important to understand the roles for NO during infection. NO is a diatomic free radical that is produced by the host immune system in response to bacterial infection. Exposure to NO and its congeners is both bactericidal and bacteriostatic, the effects being mediated through a range of well-known mechanisms, including modification of iron sulphur clusters [2], nitrosylation of thiol groups [3], nitration of tyrosine residues in the presence of superoxide [4], and through the inhibition of aerobic respiration via binding to haem cofactors of oxygen-dependent terminal oxidoreductases [5]. Bacteria can produce a variety of responses to NO [6], including systems involved in NO-detoxification, iron-sulphur (Fe-S) cluster repair, and the synthesis of NO-tolerant respiratory complexes such as cytochrome *bd*. While the toxic effects of NO and bacterial responses are wide ranging, this section focusses on the interplay between NO found at the site of infection and systems involved in bacterial energetics.

Figure 1 depicts the interaction between a ‘generic’ invading bacterial pathogen and a host immune cell. The host immune response results in death of some of the bacterial cells, which releases a variety of immunogenic ‘pathogen-associated molecular patterns’ (PAMPs), including lipopolysaccharide (LPS) from the cell envelope [7], flagellin protein from the flagellum [8] or lipoteichoic acid (LTA) from the cell wall of Gram-positives [9]. This in turn can activate signalling cascades involving Toll-Like Receptors (TLRs), the precise details of which are reviewed elsewhere and are beyond the

Received: 15 September 2023

Revised: 9 November 2023

Accepted: 10 November 2023

Version of Record published:  
17 November 2023

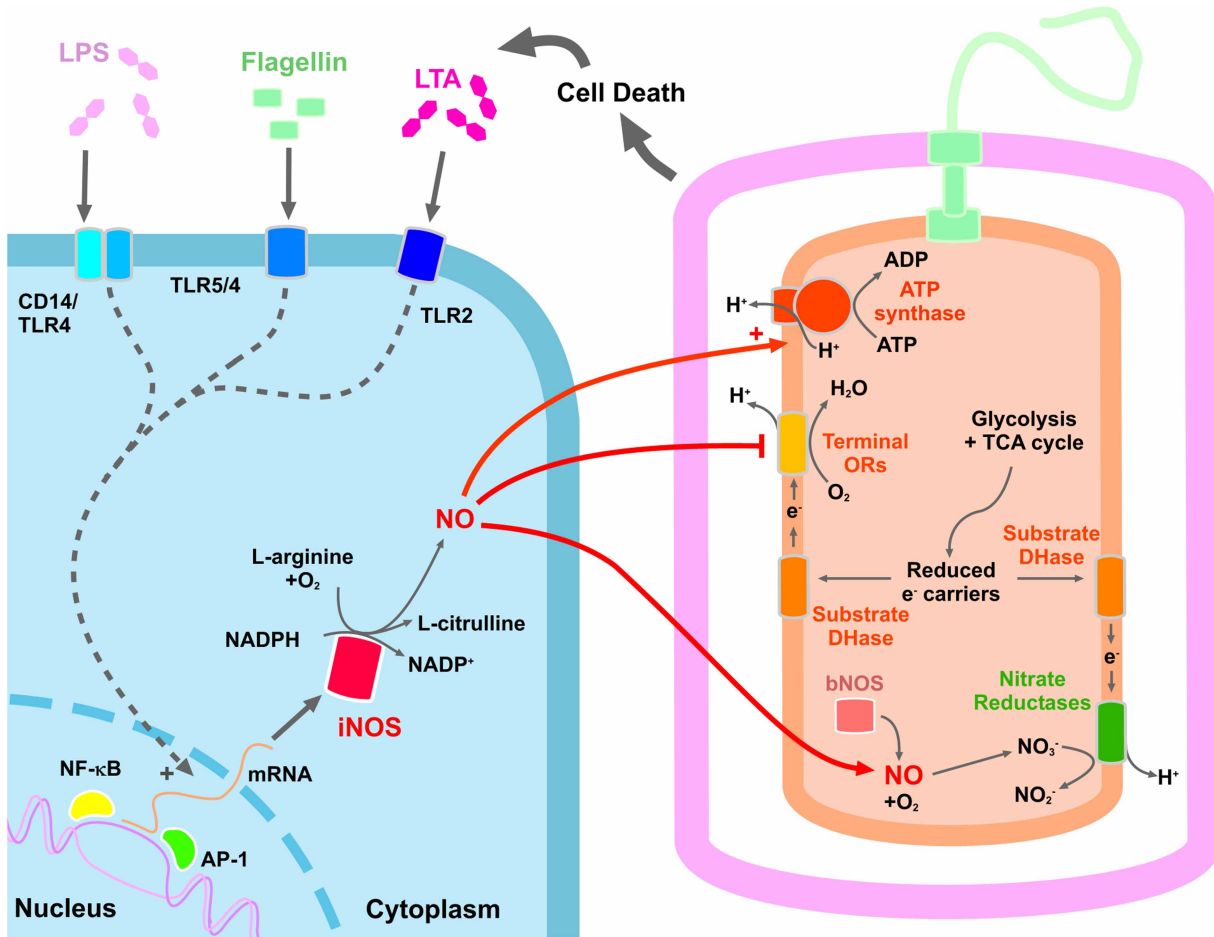

**Figure 1. Interplay between NO and bacterial energetics during infection.**

Key mechanisms in bacterial-mediated induction of host iNOS production in immune cells are shown, including the bacterial PAMPs lipopolysaccharide (LPS), flagellin and lipoteichoic acid (LTA) that are released during bacterial cell death and activate TLR-mediated signalling pathways. This causes activated NF- $\kappa$ B or AP-1 to enter the nucleus and up-regulate the transcription of NOS2 encoding the iNOS enzyme, which catalyses the conversion of L-arginine to L-citrulline and NO. NO can diffuse across the host and bacterial membranes bind to haem cofactors on oxygen-dependent oxidoreductases that shuts down aerobic respiration. NO is also produced by some bacteria via endogenous bacterial NOS enzymes. Auto-oxidation of NO may result in the production of nitrate that can be used as a respiratory electron acceptor. During NO exposure, the ATP synthase may also contribute to the proton-motive force by operating in reverse. Abbreviations: AP-1, activator protein-1; DHase, dehydrogenase; iNOS, inducible nitric oxide synthase; NF- $\kappa$ B, nuclear factor kappa B; ORs, oxidoreductases. N.B. not all mechanisms will operate in all bacteria.

scope of this article [10–12]. In short, this signalling cascade stimulates the transcription of the NOS2 gene encoding an inducible nitric oxide synthase (iNOS), leading to the production of NO from L-arginine. This NO can then diffuse out of the immune cell and into the bacterium to inhibit oxygen-dependent terminal oxidoreductases. While these haem-binding respiratory complexes are generally very sensitive to NO, other systems involved in bacterial energetics have been shown to combat nitrosative stress. For example, when *Staphylococcus aureus* is exposed to nitrosative stress the ATP synthase operates in reverse to maintain membrane potential [13], and a similar mechanism has also been reported for *Salmonella* pathogenesis [14]. In addition, Gram-positive pathogens such as *Bacillus anthracis* and *S. aureus* produce NO endogenously using a bacterial nitric oxide synthase (bNOS) enzyme, which is important during pathogenesis [15,16]. In *S. aureus*, endogenously produced NO inhibits aerobic respiration while promoting the utilisation of the TCA cycle to produce NADH, which can then be used for reduction in nitrate by the respiratory chain (N.B. in the presence of oxygen, NO is auto-oxidised to nitrate). Similarly, *E. coli* and *Salmonella* have been shown to exploit

iNOS-derived nitrate as a respiratory electron acceptor, which accelerates growth and helps these Gram-negatives to out-compete commensal gut bacteria [17,18]. All of these potential mechanisms are depicted in Figure 1.

## Bacterial energetics, NO, and the efficacy of bactericidal antibiotics

While the relationship between NO and bacterial growth and survival during infection is already complicated, another layer of complexity exists when one considers the substantial evidence that supports the influence of bacterial metabolic activity and energetics upon susceptibility to antibiotics [1,19]. Indeed, Stokes et al. [1] draw from a broad collection of literature to assemble a clear narrative on how bactericidal antibiotics can enhance metabolic activity, which in turn can itself contribute to cell death. Hence, as NO is a well-known respiratory inhibitor and can dramatically influence bacterial metabolism and energetics, it is likely that NO can modulate antibiotic efficacy through modulating these bacterial processes. This notion is explored via consideration of two postulates:

1. The efficacy of certain antibiotics is diminished by NO.
2. Antibiotics elicit elevated metabolism/bioenergetics as part of their bactericidal mechanism, which can be counteracted by the presence of NO.

To assess the first of the two postulates one can consider early work in this area that used phenotype microarrays to demonstrate that endogenous NO production via the *B. subtilis* bNOS enzyme alleviated antibiotic-mediated growth inhibition caused by a wide range of antibiotic classes, including  $\beta$ -lactams, quinolones and aminoglycosides [20]. However, only acriflavine was shown to be directly modified by NO to a less toxic product, and the hypothesised role for NO in alleviating oxidative stress that may be induced by  $\beta$ -lactams, quinolones and aminoglycosides was not unequivocally resolved in this study [20]. That said, subsequent work has confirmed that NO can diminish the efficacy of aminoglycosides [21–23],  $\beta$ -lactams [20,24], and quinolones [20], which provides compelling evidence to support acceptance of postulate 1. However, there is a notable exception to this trend where NO enhances the lethality of antibiotics in bacterial biofilms [25–27]. Although NO is a well-known signalling molecule involved in biofilm dispersal [28–32], the potentiation of antibiotic efficacy is potentially related to ease of antibiotic access and an increase in metabolic activity during a return to planktonic growth. Indeed, NO has been shown to up-regulate cellular phosphodiesterases via interaction with cell receptors leading to increased c-di-GMP degradation, which in turn produces the metabolic changes required for biofilm dispersal [29]. Hence, improved antibiotic diffusion [27] and metabolic changes [33] have been cited as reasons for the enhanced lethality of antibiotics when used in conjunction with NO in biofilms.

The second postulate may be considered by reviewing the influence of aminoglycosides,  $\beta$ -lactams and quinolones upon the energetic state of the bacterial cell. All three classes of antibiotic have been shown to elevate respiratory oxygen consumption [34] and to elicit the formation of reactive oxygen species (ROS) that may contribute to cell death [35–38]. Conversely, previous studies conclude that the majority of superoxide and peroxide are derived from the autooxidation of non-respiratory flavoproteins [39–41], although given the scale of conflicting evidence in the literature it would seem premature to exclude the respiratory chain as a source of ROS. A good example of antibiotic-mediated increases in metabolic activity is the  $\beta$ -lactam mecillinam, which has been shown to induce an energetically expensive futile cycle that contributes to cell death [42]. Inducing respiratory metabolism has also been shown to enhance the efficacy of quinolones against *Mycobacterium smegmatis* and metabolically repressed *E. coli* and *S. aureus* [43]. However, other studies with *E. coli* have reported that  $\beta$ -lactams, quinolones and aminoglycosides do not elevate peroxide production nor promote accumulation of intracellular free iron, and lethality persists in the absence of oxygen [44]. This supports the hypothesis that mechanisms of lethality for these antibiotic classes are independent of ROS. Indeed, for aminoglycosides alternative mechanisms of lethality have been reported, including membrane hyperpolarisation via reversal of ATP synthase activity [45–47] and through elevated aminoglycoside uptake that is dependent upon Fe-S cluster biosynthesis [48]. The electrical component of the PMF has been shown to be related to aminoglycoside uptake in *Bacillus subtilis*, *S. aureus*, *E. coli* and *Salmonella* [49,50], and the role of PMF in aminoglycoside lethality is supported by recent work using membrane uncouplers and demonstration that gentamicin does not impose significant oxidative stress upon *E. coli* [45]. Also, voltage-gated calcium influxes have been used to

demonstrate aminoglycoside-mediated increases in membrane polarity, and membrane polarisation was shown to be unnecessary for aminoglycoside uptake but essential for bactericidal effects [47].

Figure 2 depicts potential routes for how NO may interfere with energetic processes associated with cell death for these three antibiotic classes. NO could diminish ROS generation through direct inhibition of aerobic respiration. In addition, NO-mediated inhibition of aerobic respiratory complexes might also diminish the PMF and help to counteract the excessive PMF that is generated during aminoglycoside exposure [47], and lowering the PMF may also lead to reduced aminoglycoside uptake [22]. However, it is more difficult to envisage how NO-mediated stimulation of nitrate reductase activity [17,18] might alleviate aminoglycoside-mediated membrane hyperpolarisation, as one might expect that these electrogenic respiratory complexes would exacerbate proton efflux. However, this process of course depends upon the oxygen levels, as nitrate reductases are maximally expressed under anaerobic conditions in the presence of nitrate, but most studies on NO and aminoglycosides have been performed under aerobic conditions where nitrate reductases are poorly expressed.

Thus far, we have mainly focussed on the interaction between NO, aerobic respiration and antimicrobial susceptibility, which excludes our knowledge of antibiotics killing bacteria under anaerobic conditions. There is a

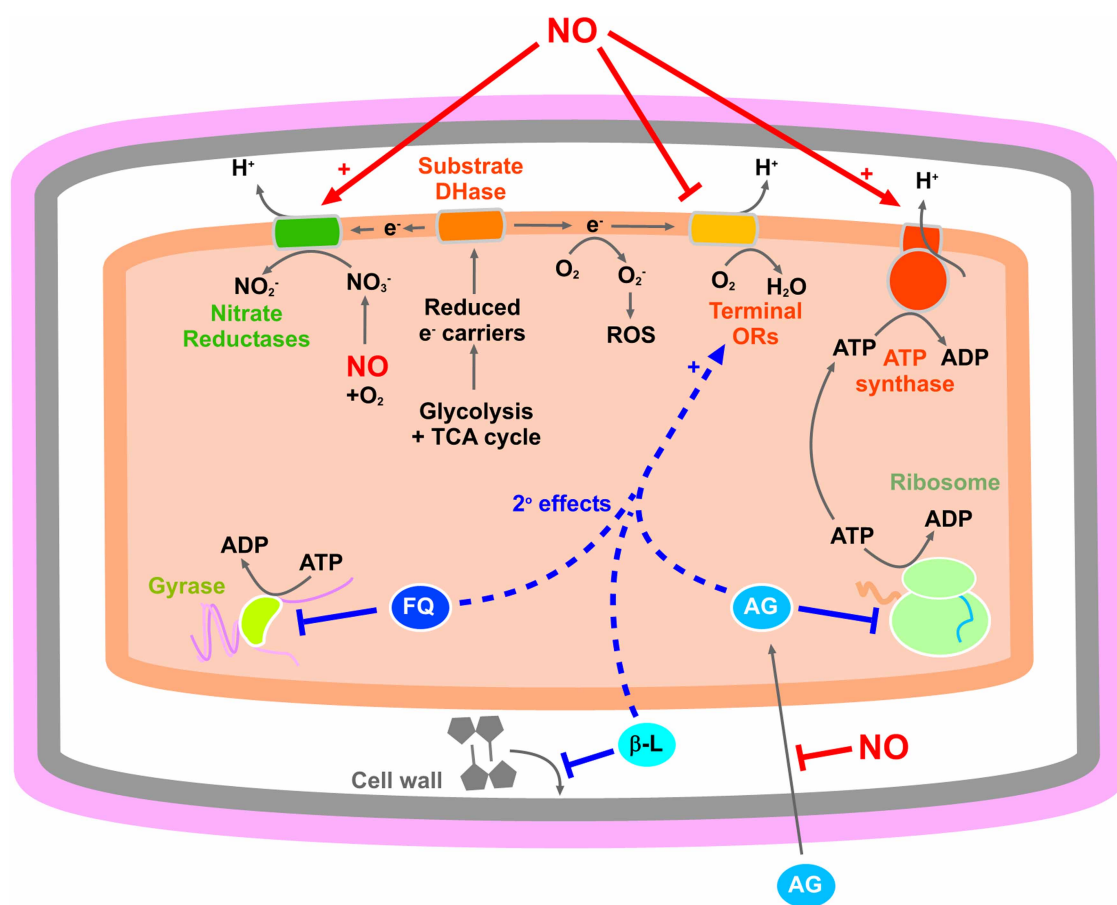

**Figure 2. NO diminishes antibiotic efficacy potentially via modulating energetics.**

Known mechanisms of how NO modulates bacterial energetics are shown (from Figure 1) alongside their potential impact upon the secondary effects of bactericidal antibiotics that cause cell death. Exposure to fluoroquinolones (FQ),  $\beta$ -lactam ( $\beta$ -L) and aminoglycosides all have the common secondary effect of elevating aerobic respiration and ROS generation, which in turn contributes to cell death. Aminoglycosides may also cause ATP accumulation, which can drive the ATP synthase in reverse and elicit cell death via membrane hyperpolarisation. Also, NO-mediated perturbations in energy metabolism can decrease aminoglycoside uptake. Proton translocation across the membrane is via a vectorial mechanism linked to quinol oxidation for nitrate reductases, whereas some oxygen-dependent complexes can also pump protons. Abbreviations: DHase, dehydrogenase; ORs, oxidoreductases; ROS, reactive oxygen species.

large literature that addresses the need for alternative antibiotic regimens to treat anaerobes [51,52] but there has been very little focus on the influence of NO upon antibiotic efficacy during anaerobiosis, except for a recent study reporting that an NO donor can diminish the potency of gentamicin under anoxic growth [23]. Given the ability of some bacteria to both produce and consume NO during anaerobic respiration using nitrite as an electron donor [53–55], and bearing in mind the well-known anaerobic NO-resistance machineries in bacteria [56], there appears to be an important gap in our knowledge that relates to how NO may more broadly impact upon antibiotic treatments during anaerobiosis. One might assume that oxygen-dependent terminal oxidoreductases and ROS would not play a significant role in antibiotic-mediated bacterial killing during anaerobiosis, but an unequivocal elucidation of anaerobic bactericidal mechanisms remains elusive.

## Conclusions

While targeting bacterial energetics is a very promising route for the development of new antimicrobials [57], careful considerations would need to be made before using these in conjunction with antibiotic classes that require a working respiratory chain for optimal efficacy. There is also a huge literature on NO releasers as novel antimicrobials [58–60], although little consideration has been given to how NO therapies might impact upon conventional antibiotic treatments, or indeed how iNOS-derived NO might affect antibiotic action at the site of infection. Hence, in light of the dramatic effects that NO has upon antibiotic efficacy, it would be sensible to give greater consideration to how NO and bacterial energetics can influence the efficacy of new antibiotics.

## Competing Interests

The authors declare that there are no competing interests associated with the manuscript.

## Funding

This work was supported by a VC PhD studentship (University of Kent).

## Open Access

Open access for this article was enabled by the participation of University of Kent in an all-inclusive *Read & Publish* agreement with Portland Press and the Biochemical Society under a transformative agreement with JISC.

## Author Contributions

C.M.S. and M.S. wrote and edited the paper.

## Abbreviations

Fe-S, iron-sulphur; LPS, lipopolysaccharide; LTA, lipoteichoic acid; NO, nitric oxide; PAMP, pathogen-associated molecular pattern; PMF, proton-motive force; ROS, reactive oxygen species; TLR, Toll-like receptor.

## References

- 1 Stokes, J.M., Lopatkin, A.J., Lobritz, M.A. and Collins, J.J. (2019) Bacterial metabolism and antibiotic efficacy. *Cell Metab.* **30**, 251–259 <https://doi.org/10.1016/j.cmet.2019.06.009>
- 2 Jones-Carson, J., Laughlin, J., Hamad, M.A., Stewart, A.L., Voskuil, M.I. and Vázquez-Torres, A. (2008) Inactivation of [Fe-S] metalloproteins mediate nitric oxide-dependent killing of *Burkholderia mallei*. *PLoS ONE* **9**, e1976 <https://doi.org/10.1371/journal.pone.0001976>
- 3 Laver, J.R., McLean, S., Bowman, L.A., Harrison, L.J., Read, R.C. and Poole, R.K. (2013) Nitrosothiols in bacterial pathogens and pathogenesis. *Antioxid. Redox Signal.* **18**, 309–322 <https://doi.org/10.1089/ars.2012.4767>
- 4 Quijano, C., Romero, N. and Radi, R. (2005) Tyrosine nitration by superoxide and nitric oxide fluxes in biological systems: modeling the impact of superoxide dismutase and nitric oxide diffusion. *Free Radic. Biol. Med.* **39**, 728–741 <https://doi.org/10.1016/j.freeradbiomed.2005.04.014>
- 5 Borisov, V.B. and Forte, E. (2022) Bioenergetics and reactive nitrogen species in bacteria. *Int. J. Mol. Sci.* **23**, 7321 <https://doi.org/10.3390/ijms23137321>
- 6 Fang, F.C. and Vazquez-Torres, A. (2019) Reactive nitrogen species in host-bacterial interactions. *Curr. Opin. Immunol.* **60**, 96–102 <https://doi.org/10.1016/j.coi.2019.05.008>
- 7 Lowenstein, C.J. and Padalko, E. (2004) iNOS (NOS2) at a glance. *J. Cell Sci.* **117**, 2865–2867 <https://doi.org/10.1242/jcs.01166>
- 8 Mizel, S.B., Honko, A.N., Moors, M.A., Smith, P.S. and West, A.P. (2003) Induction of macrophage nitric oxide production by gram-negative flagellin involves signalling via heteromeric Toll-like receptor 5/Toll-like receptor 4 complexes. *J. Immunol.* **170**, 6217–6223 <https://doi.org/10.4049/jimmunol.170.12.6217>
- 9 Chiu, W.T., Lin, Y.L., Chou, C.W. and Chen, R.M. (2009) Propofol inhibits lipoteichoic acid-induced iNOS gene expression in macrophages possibly through downregulation of toll-like receptor 2-mediated activation of Raf-MEK1/2-ERK1/2-IKK-NF kappa B. *Chem. Biol. Interact.* **181**, 430–439 <https://doi.org/10.1016/j.cbi.2009.06.011>

- 10 Saini, R. and Singh, S. (2019) Inducible nitric oxide synthase: an asset to neutrophils. *J. Leukoc. Biol.* **105**, 49–61 <https://doi.org/10.1002/JLB.4RU0418-161R>
- 11 Abdul-Cader, M.S., Amarasinghe, A. and Abdul-Careem, M.F. (2016) Activation of Toll-like receptor signaling pathways leading to nitric oxide-mediated antiviral responses. *Arch. Virol.* **161**, 2075–2086 <https://doi.org/10.1007/s00705-016-2904-x>
- 12 Kopitar-Jerala, N. (2017) The role of interferons in inflammation and inflammasome activation. *Front. Immunol.* **8**, 873 <https://doi.org/10.3389/fimmu.2017.00873>
- 13 Grosser, M.R., Paluscio, E., Thurlow, L.R., Dillon, M.M., Cooper, V.S., Kawula, T.H. et al. (2018) Genetic requirements for *Staphylococcus aureus* nitric oxide resistance and virulence. *PLoS Pathog.* **14**, e1006907 <https://doi.org/10.1371/journal.ppat.1006907>
- 14 Fitzsimmons, L., Liu, L., Porwollik, S., Chakraborty, S., Desai, P., Tapscott, T. et al. (2018) Zinc-dependent substrate-level phosphorylation powers *Salmonella* growth under nitrosative stress of the innate host response. *PLoS Pathog.* **26**, e1007388 <https://doi.org/10.1371/journal.ppat.1007388>
- 15 Shatalin, K., Gusarov, I., Avetissova, E., Shatalina, Y., Mcquade, L.E., Lippard, S.J. et al. (2008) *Bacillus anthracis*-derived nitric oxide is essential for pathogen virulence and survival in macrophages. *Proc. Natl Acad. Sci. U.S.A.* **105**, 1009–1013 <https://doi.org/10.1073/pnas.0710950105>
- 16 Kinkel, T.L., Ramos-Montañez, S., Pando, J.M., Tadeo, D.V., Strom, E.N., Libby, S.J. et al. (2016) An essential role for bacterial nitric oxide synthase in *Staphylococcus aureus* electron transfer and colonization. *Nat. Microbiol.* **2**, 16224 <https://doi.org/10.1038/nmicrobiol.2016.224>
- 17 Winter, S.E., Thiennimitr, P., Winter, M.G., Butler, B.P., Huseby, D.L., Crawford, R.W. et al. (2010) Gut inflammation provides a respiratory electron acceptor for *Salmonella*. *Nature* **467**, 426–429 <https://doi.org/10.1038/nature09415>
- 18 Winter, S.E., Winter, M.G., Xavier, M.N., Thiennimitr, P., Poon, V., Keestra, A.M. et al. (2013) Host-derived nitrate boosts growth of *E. coli* in the inflamed gut. *Science* **339**, 708–711 <https://doi.org/10.1126/science.1232467>
- 19 Voskuil, M.I., Covey, C.R. and Walter, N.D. (2018) Antibiotic lethality and membrane bioenergetics. *Adv. Microb. Physiol.* **73**, 77–122 <https://doi.org/10.1016/bs.ampbs.2018.06.002>
- 20 Gusarov, I., Shatalin, K., Starodubtseva, M. and Nudler, E. (2009) Endogenous nitric oxide protects bacteria against a wide spectrum of antibiotics. *Science* **325**, 1380–1384 <https://doi.org/10.1126/science.1175439>
- 21 Kuang, S., Chen, Y., Chen, J., Peng, X., Chen, Z. and Li, H. (2021) Synergy of alanine and gentamicin to reduce nitric oxide for elevating killing efficacy to antibiotic-resistant *Vibrio alginolyticus*. *Virulence* **12**, 1737–1753 <https://doi.org/10.1080/21505594.2021.1947447>
- 22 McColister, B.D., Hoffman, M., Husain, M. and Vazquez-Torres, A. (2011) Nitric oxide protects bacteria from aminoglycosides by blocking the energy-dependent phases of drug uptake. *Antimicrob. Agents Chemother.* **55**, 2189–2196 <https://doi.org/10.1128/aac.01203-10>
- 23 Ribeiro, C.A., Rahman, L.A., Holmes, L.G., Woody, A.M., Webster, C.M., Monaghan, T.I. et al. (2021) Nitric oxide (NO) elicits aminoglycoside tolerance in *Escherichia coli* but antibiotic resistance gene carriage and NO sensitivity have not co-evolved. *Arch. Microbiol.* **203**, 2541–2550 <https://doi.org/10.1007/s00203-021-02245-2>
- 24 Jones-Carson, J., Zweifel, A.E., Tapscott, T., Austin, C., Brown, J.M., Jones, K.L. et al. (2014) Nitric oxide from IFN gamma-primed macrophages modulates the antimicrobial activity of beta-lactams against the intracellular pathogens *Burkholderia pseudomallei* and Nontyphoidal *Salmonella*. *PLoS Negl. Trop. Dis.* **8**, e3079 <https://doi.org/10.1371/journal.pntd.0003079>
- 25 Rouillard, K.R., Novak, O.P., Pistiolis, A.M., Yang, L., Ahonen, M.J.R., McDonald, R.A. et al. (2021) Exogenous nitric oxide improves antibiotic susceptibility in resistant bacteria. *ACS Infect. Dis.* **7**, 23–33 <https://doi.org/10.1021/acinfecdis.0c00337>
- 26 Ren, H., Wu, J.F., Colletta, A., Meyerhoff, M.E. and Xi, C.W. (2016) Efficient eradication of mature *Pseudomonas aeruginosa* biofilm via controlled delivery of nitric oxide combined with antimicrobial peptide and antibiotics. *Front. Microbiol.* **7**, 1260 <https://doi.org/10.3389/fmicb.2016.01260>
- 27 Howlin, R.P., Cathie, K., Hall-Stoodley, L., Cornelius, V., Duignan, C., Allan, R.N. et al. (2017) Low-dose nitric oxide as targeted anti-biofilm adjunctive therapy to treat chronic *Pseudomonas aeruginosa* infection in cystic fibrosis. *Mol. Ther.* **25**, 2104–2116 <https://doi.org/10.1016/j.ymthe.2017.06.021>
- 28 Cutruzzola, F. and Frankenberg-Dinkel, N. (2016) Origin and impact of nitric oxide in *Pseudomonas aeruginosa* biofilms. *J. Bacteriol.* **198**, 55–65 <https://doi.org/10.1128/jb.00371-15>
- 29 Barraud, N., Schleheck, D., Klebensberger, J., Webb, J.S., Hassett, D.J., Rice, S.A. et al. (2009) Nitric oxide signaling in *Pseudomonas aeruginosa* biofilms mediates phosphodiesterase activity, decreased cyclic di-GMP levels, and enhanced dispersal. *J. Bacteriol.* **191**, 7333–7342 <https://doi.org/10.1128/jb.00975-09>
- 30 Barraud, N., Kelso, M.J., Rice, S.A. and Kjelleberg, S. (2015) Nitric oxide: a key mediator of biofilm dispersal with applications in infectious diseases. *Curr. Pharm. Design.* **21**, 31–42 <https://doi.org/10.2174/1381612820666140905112822>
- 31 Barraud, N., Hassett, D.J., Hwang, S.-H., Rice, S.A., Kjelleberg, S. and Webb, J.S. (2006) Involvement of nitric oxide in biofilm dispersal of *Pseudomonas aeruginosa*. *J. Bacteriol.* **188**, 7344–7353 <https://doi.org/10.1128/jb.00779-06>
- 32 Li, Y., Heine, S., Entian, M., Sauer, K. and Frankenberg-Dinkel, N. (2013) NO-induced biofilm dispersion in *Pseudomonas aeruginosa* is mediated by an MHT domain-coupled phosphodiesterase. *J. Bacteriol.* **195**, 3531–3542 <https://doi.org/10.1128/jb.01156-12>
- 33 Allan, R.N., Morgan, S., Brito-Mutunayagam, S., Skipp, P., Feelisch, M., Hayes, S.M. et al. (2016) Low concentrations of nitric oxide modulate *Streptococcus pneumoniae* biofilm metabolism and antibiotic tolerance. *Antimicrob. Agents Chemother.* **60**, 2456–2466 <https://doi.org/10.1128/aac.02432-15>
- 34 Lobritz, M.A., Belenky, P., Porter, C.B.M., Gutierrez, A., Yang, J.H., Schwarz, E.G. et al. (2015) Antibiotic efficacy is linked to bacterial cellular respiration. *Proc. Natl Acad. Sci. U.S.A.* **112**, 8173–8180 <https://doi.org/10.1073/pnas.1509743112>
- 35 Vatansever, F., de Melo, W.C.M.A., Avci, P., Vecchio, D., Sadasivam, M., Gupta, A. et al. (2013) Antimicrobial strategies centered around reactive oxygen species: bactericidal antibiotics, photodynamic therapy, and beyond. *FEMS Microbiol. Rev.* **37**, 955–989 <https://doi.org/10.1111/1574-6976.12026>
- 36 Dwyer, D.J., Belenky, P.A., Yang, J.H., MacDonald, I.C., Martell, J.D., Takahashi, N. et al. (2014) Antibiotics induce redox-related physiological alterations as part of their lethality. *Proc. Natl Acad. Sci. U.S.A.* **111**, E2100–E2109 <https://doi.org/10.1073/pnas.1401876111>
- 37 Dwyer, D.J., Kohanski, M.A., Hayete, B. and Collins, J.J. (2007) Gyrase inhibitors induce an oxidative damage cellular death pathway in *Escherichia coli*. *Mol. Syst. Biol.* **3**, 91 <https://doi.org/10.1038/msb4100135>
- 38 Foti, J.J., Devadoss, B., Winkler, J.A., Collins, J.J. and Walker, G.C. (2012) Oxidation of the guanine nucleotide pool underlies cell death by bactericidal antibiotics. *Science* **336**, 315–319 <https://doi.org/10.1126/science.1219192>

- 39 Seaver, L.C. and Imlay, J.A. (2004) Are respiratory enzymes the primary sources of intracellular hydrogen peroxide? *J. Biol. Chem.* **279**, 48742–48750 <https://doi.org/10.1074/jbc.M408754200>
- 40 Korshunov, S. and Imlay, J.A. (2010) Two sources of endogenous hydrogen peroxide in *Escherichia coli*. *Mol. Microbiol.* **75**, 1389–1401 <https://doi.org/10.1111/j.1365-2958.2010.07059.x>
- 41 Imlay, J.A. (2013) The molecular mechanisms and physiological consequences of oxidative stress: lessons from a model bacterium. *Nat. Rev. Microbiol.* **11**, 443–454 <https://doi.org/10.1038/nrmicro3032>
- 42 Cho, S.-H., Parsonage, D., Thurston, C., Dutton, R.J., Poole, L.B., Collet, J.-F. et al. (2012) A new family of membrane electron transporters and its substrates, including a new cell envelope peroxiredoxin, reveal a broadened reductive capacity of the oxidative bacterial cell envelope. *mBio* **3**, e00291-11 <https://doi.org/10.1128/mbio.00291-11>
- 43 Gutierrez, A., Jain, S., Bhargava, P., Hamblin, M., Lobritz, M.A. and Collins, J.J. (2017) Understanding and sensitizing density-dependent persistence to quinolone antibiotics. *Mol. Cell* **68**, 1147–1154.e3 <https://doi.org/10.1016/j.molcel.2017.11.012>
- 44 Liu, Y.Y. and Imlay, J.A. (2013) Cell death from antibiotics without the involvement of reactive oxygen species. *Science* **339**, 1210–1213 <https://doi.org/10.1126/science.1232751>
- 45 Webster, C.M., Woody, A.M., Fusseini, S., Holmes, L.G., Robinson, G.K. and Shepherd, M. (2022) Proton motive force underpins respiration-mediated potentiation of aminoglycoside lethality in pathogenic *Escherichia coli*. *Arch. Microbiol.* **204**, 120 <https://doi.org/10.1007/s00203-021-02710-y>
- 46 Webster, C.M. and Shepherd, M. (2022) A mini-review: environmental and metabolic factors affecting aminoglycoside efficacy. *World J. Microb. Biotechnol.* **39**, 7 <https://doi.org/10.1007/s11274-022-03445-8>
- 47 Bruni, G.N. and Kralj, J.M. (2020) Membrane voltage dysregulation driven by metabolic dysfunction underlies bactericidal activity of aminoglycosides. *eLife* **9**, e58706 <https://doi.org/10.7554/eLife.58706>
- 48 Ezraty, B., Vergnes, A., Banzhaf, M., Duverger, Y., Huguenot, A., Brochado, A.R. et al. (2013) Fe-S cluster biosynthesis controls uptake of aminoglycosides in a ROS-less death pathway. *Science* **340**, 1583–1587 <https://doi.org/10.1126/science.1238328>
- 49 Taber, H.W., Mueller, J.P., Miller, P.F. and Arrow, A.S. (1987) Bacterial uptake of aminoglycoside antibiotics. *Microbiol. Rev.* **51**, 439–457 <https://doi.org/10.1128/mr.51.4.439-457.1987>
- 50 Farha, M.A., Verschoor, C.P., Bowdish, D. and Brown, E.D. (2013) Collapsing the proton motive force to identify synergistic combinations against *Staphylococcus aureus*. *Chem. Biol.* **20**, 1168–1178 <https://doi.org/10.1016/j.chembiol.2013.07.006>
- 51 Brook, I. (2011) Antimicrobial treatment of anaerobic infections. *Expert Opin. Pharmacother.* **12**, 1691–1707 <https://doi.org/10.1517/14656566.2011.576672>
- 52 Dubreuil, L., Veloo, A.C. and Soki, J. (2021) Correlation between antibiotic resistance and clinical outcome of anaerobic infections; mini-review. *Anaerobe* **72**, 102463 <https://doi.org/10.1016/j.anaerobe.2021.102463>
- 53 Gilberthorpe, N.J. and Poole, R.K. (2008) Nitric oxide homeostasis in *Salmonella Typhimurium*: roles of respiratory nitrate reductase and flavohemoglobin. *J. Biol. Chem.* **283**, 11146–11154 <https://doi.org/10.1074/jbc.M708019200>
- 54 Mills, P.C., Rowley, G., Spiro, S., Hinton, J.C.D. and Richardson, D.J. (2008) A combination of cytochrome c nitrite reductase (NrfA) and flavorubredoxin (NorV) protects *Salmonella enterica serovar Typhimurium* against killing by NO in anoxic environments. *Microbiology* **154**, 1218–1228 <https://doi.org/10.1099/mic.0.2007/014290-0>
- 55 van Wonderen, J.H., Burlat, B., Richardson, D.J., Cheesman, M.R. and Butt, J.N. (2008) The nitric oxide reductase activity of cytochrome c nitrite reductase from *Escherichia coli*. *J. Biol. Chem.* **283**, 9587–9594 <https://doi.org/10.1074/jbc.M709090200>
- 56 Cole, J.A. (2018) Anaerobic bacterial response to nitrosative stress. *Adv. Microb. Physiol.* **72**, 193–237 <https://doi.org/10.1016/bs.ampbs.2018.01.001>
- 57 Hards, K. and Cook, G.M. (2018) Targeting bacterial energetics to produce new antimicrobials. *Drug Resist. Updat.* **36**, 1–12 <https://doi.org/10.1016/j.drug.2017.11.001>
- 58 Schairer, D.O., Chouake, J.S., Nosanchuk, J.D. and Friedman, A.J. (2012) The potential of nitric oxide releasing therapies as antimicrobial agents. *Virulence* **3**, 271–279 <https://doi.org/10.4161/viru.20328>
- 59 Rong, F., Tang, Y.Z., Wang, T.J., Feng, T., Song, J., Li, P. et al. (2019) Nitric oxide-releasing polymeric materials for antimicrobial applications: a review. *Antioxidants* **8**, 556 <https://doi.org/10.3390/antiox8110556>
- 60 Poh, W.H. and Rice, S.A. (2022) Recent developments in nitric oxide donors and delivery for antimicrobial and anti-biofilm applications. *Molecules* **27**, 674 <https://doi.org/10.3390/molecules27030674>
